# Supplementary material for: Changes in Overall Survival over Time for Patients with de novo Metastatic Breast Cancer
Source: MDPI journal article supplement (doi:10.3390/cancers13112650), 2021-05-28
Supplement: s1 [file s1]

SUPPLEMENTARY FIGURES

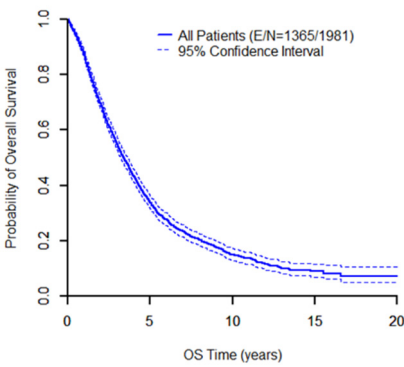

Figure S1. Kaplan-Meier curve of overall survival for all dnMBC patients

Figure S2.

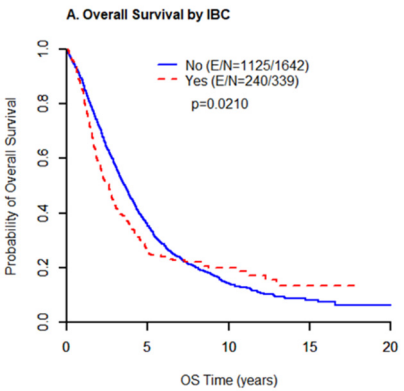

A. Kaplan-Meier curve of overall survival stratified by IBC

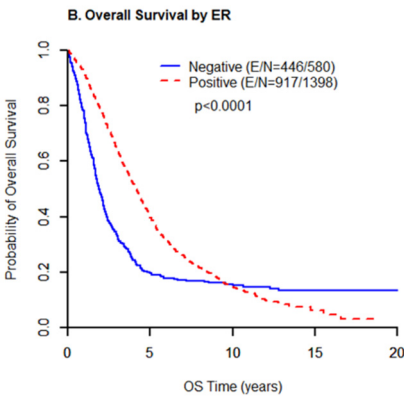

B. Kaplan-Meier curve of overall survival stratified by ER

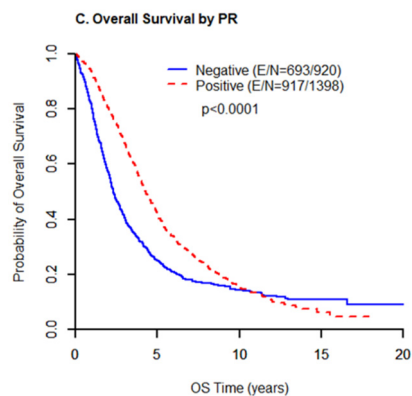

C. Kaplan-Meier curve of overall survival stratified by PR

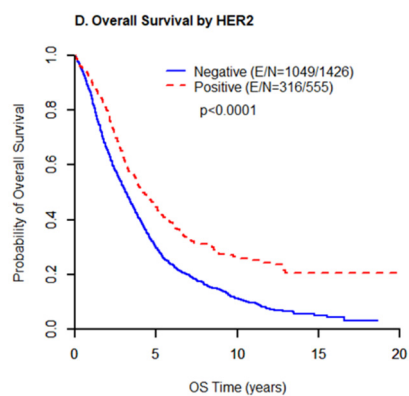

D. Kaplan-Meier curve of overall survival stratified by HER2

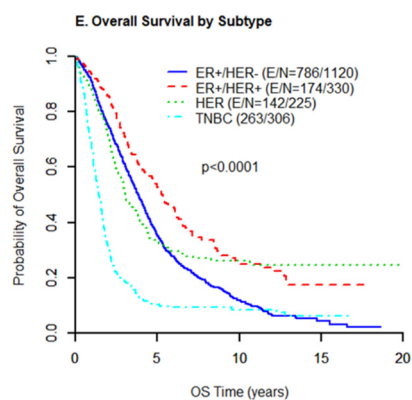

E. Kaplan-Meier curve of overall survival stratified by subtypes

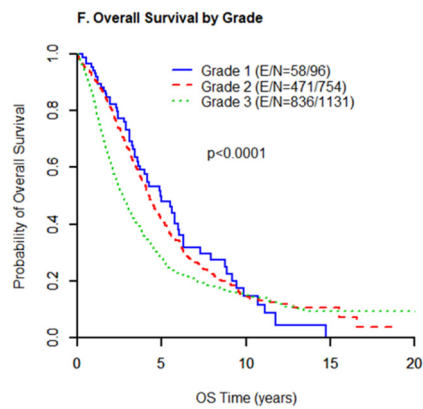

F. Kaplan-Meier curve of overall survival stratified by grade

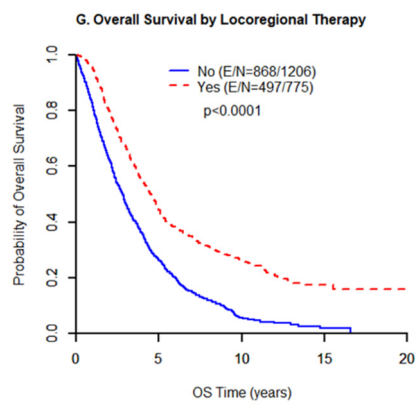

G. Kaplan-Meier curve of overall survival stratified by the locoregional therapy

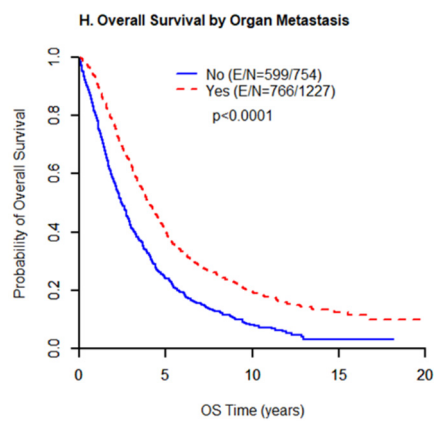

H. Kaplan-Meier curve of overall survival stratified by single or multiple organ metastasis
